# Supplementary material for: Gold(i) complexes with heteroaryl phosphine ligands
Source: Royal Society of Chemistry journal article supplement (doi:10.1039/c3dt52893f), 2013-12-04

Supplementary Information for

**Gold(I) Complexes with Heteroaryl Phosphine Ligands**

**Christian Sarcher,<sup>a</sup>Saeid Farsadpour,<sup>b</sup>Leila Taghizadeh Ghoochany,<sup>b</sup>Yu Sun,<sup>b</sup>Werner Thiel,<sup>\*b</sup> and Peter W. Roesky<sup>\*a</sup>**

<sup>a</sup>Institut für Anorganische Chemie, Karlsruher Institut für Technologie (KIT), Engesserstr. 15, Geb. 30.45, 76131 Karlsruhe (Germany); <sup>b</sup>Fachbereich Chemie, Erwin-Schrödinger-Str. 54, 67661, Kaiserslautern (Germany).

16 Pages

## NMR Spectra of the Ligands

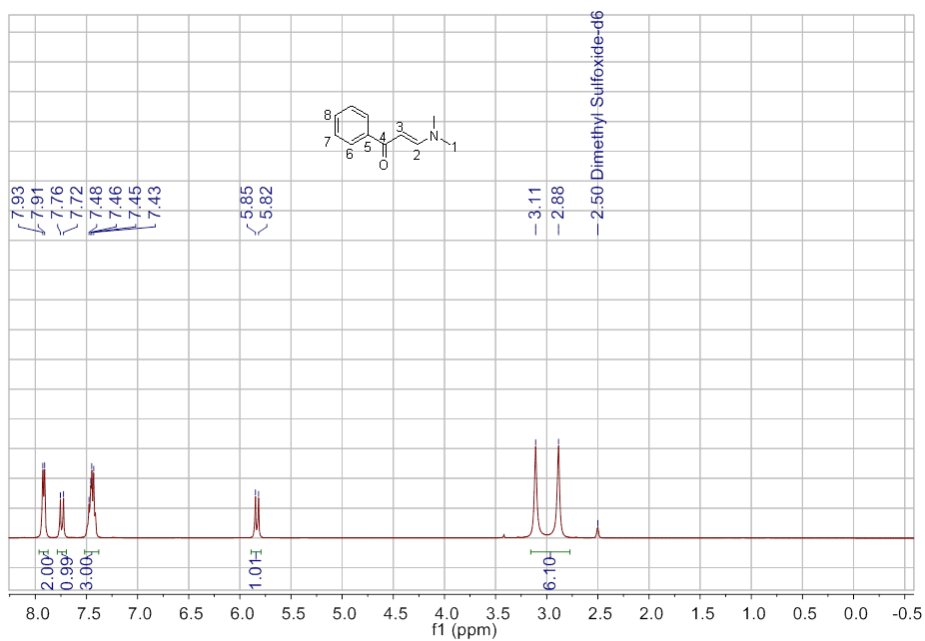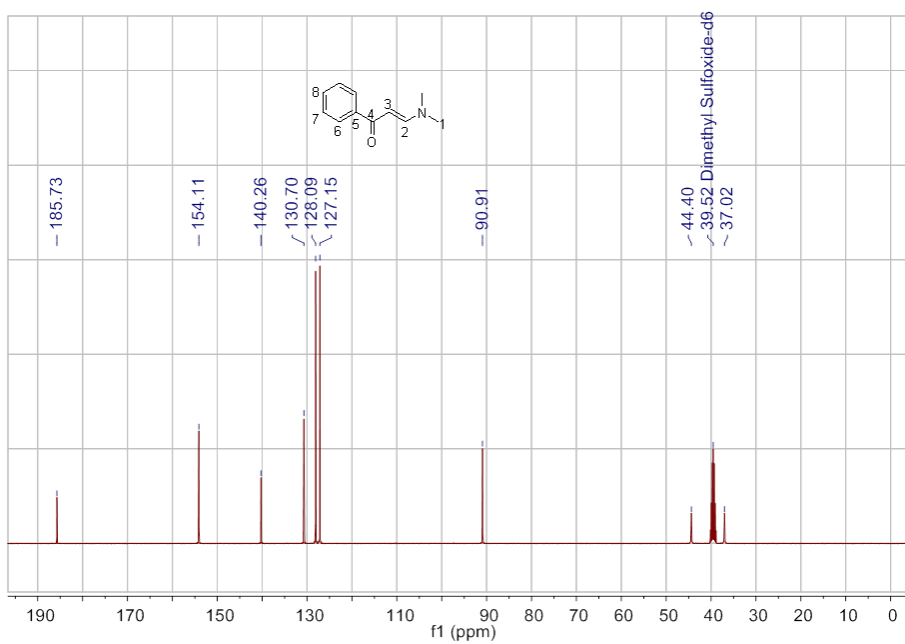

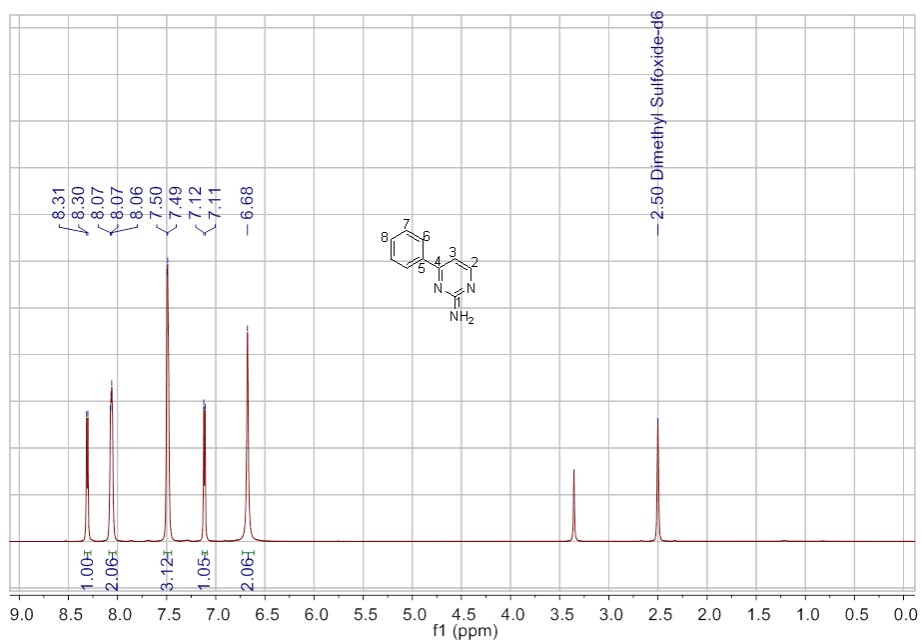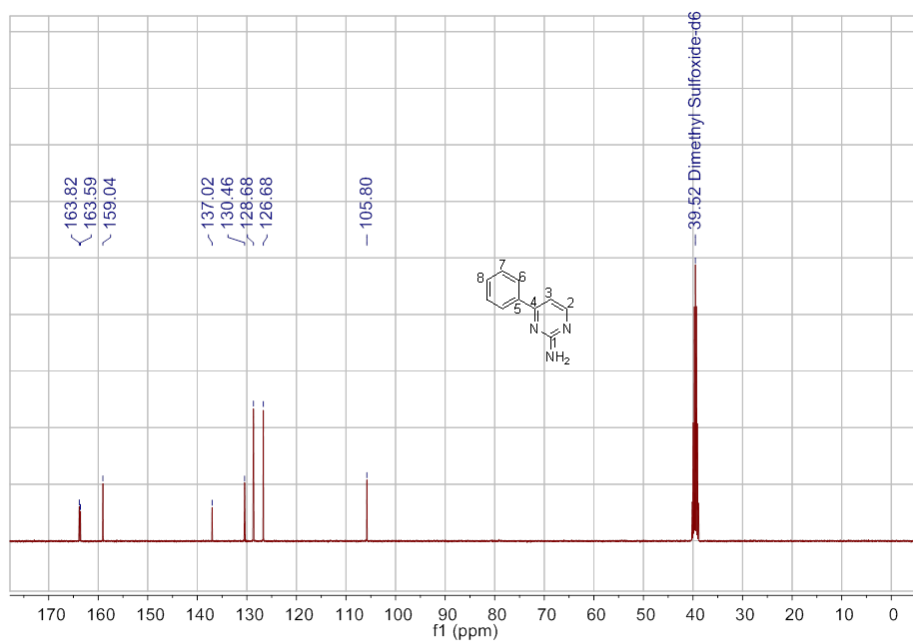

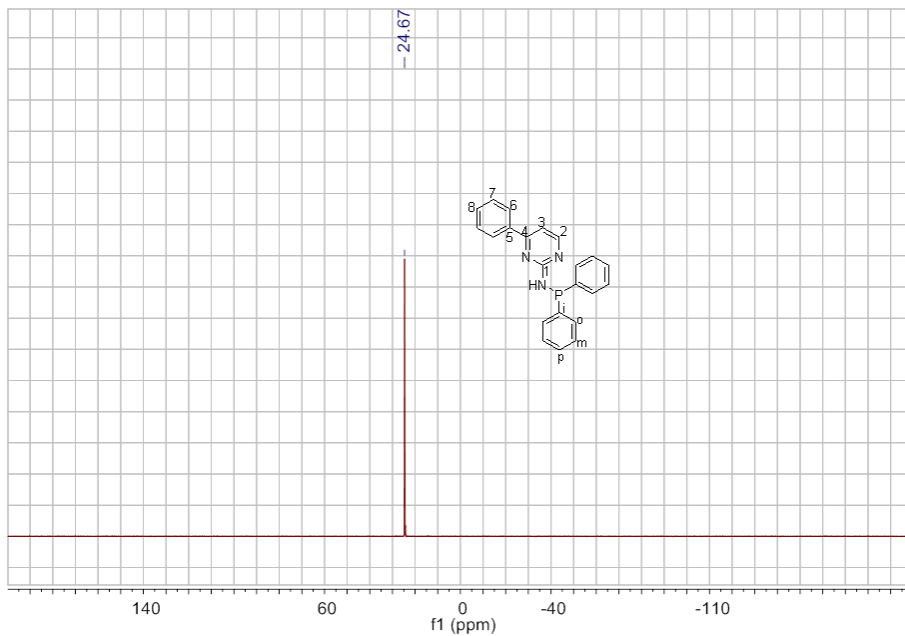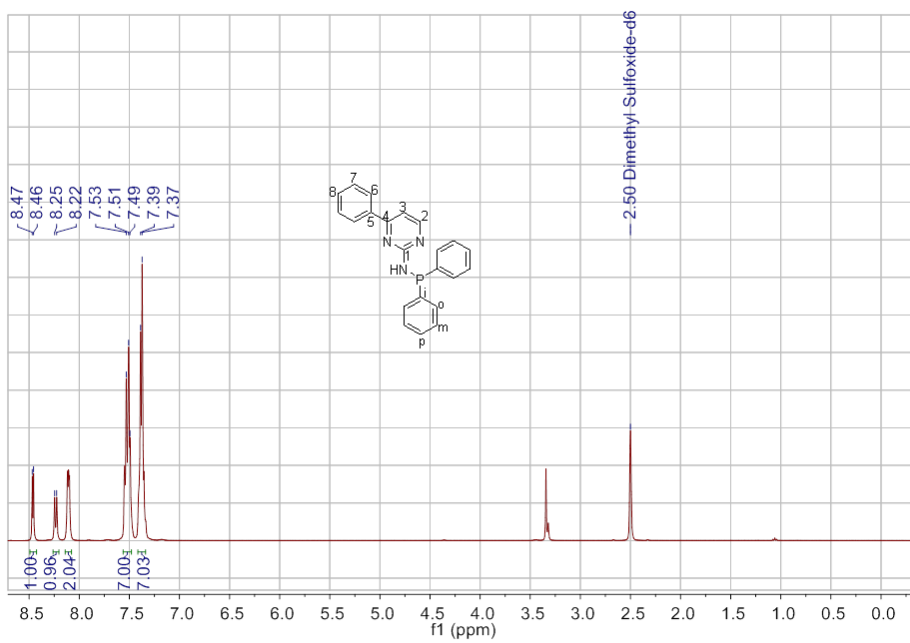

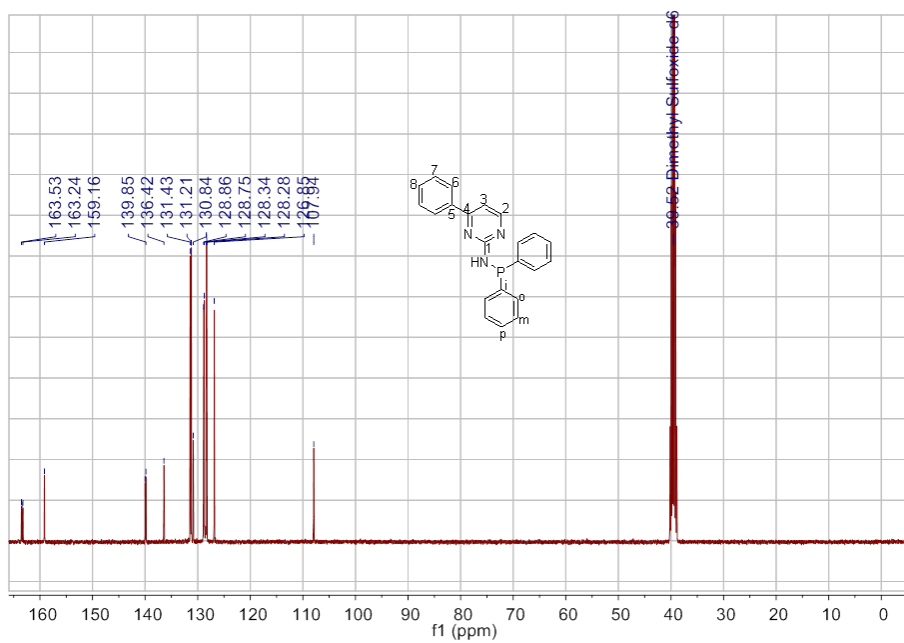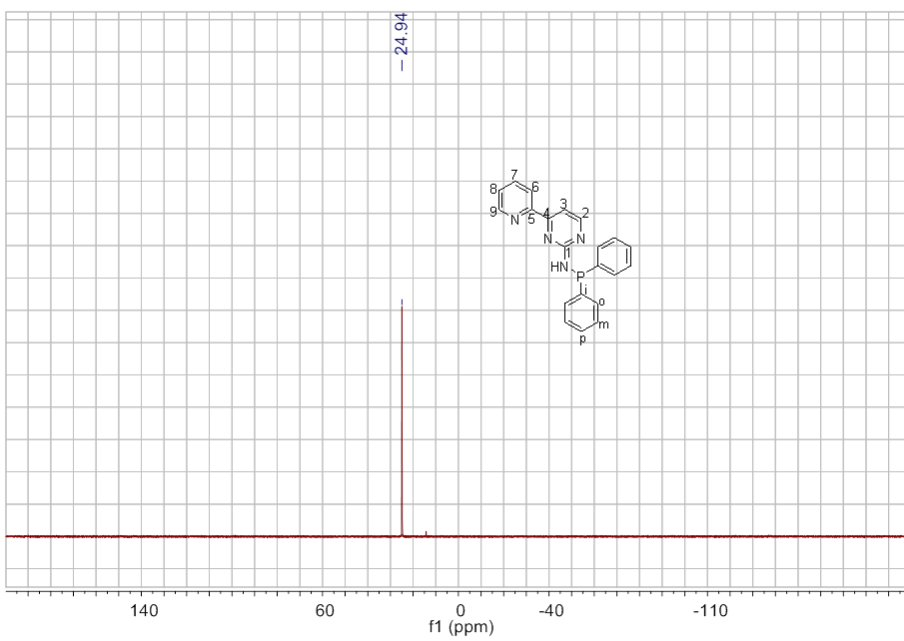

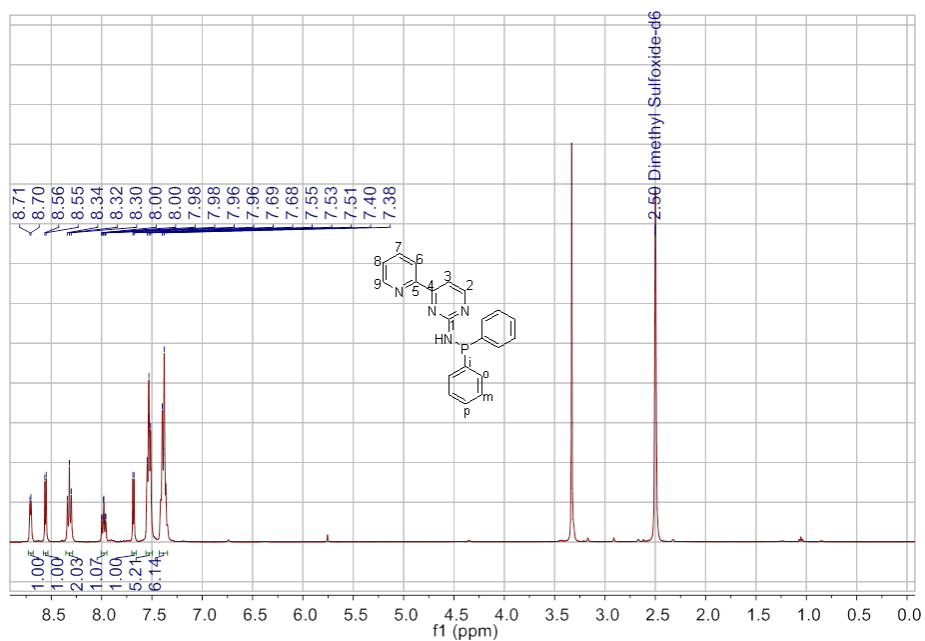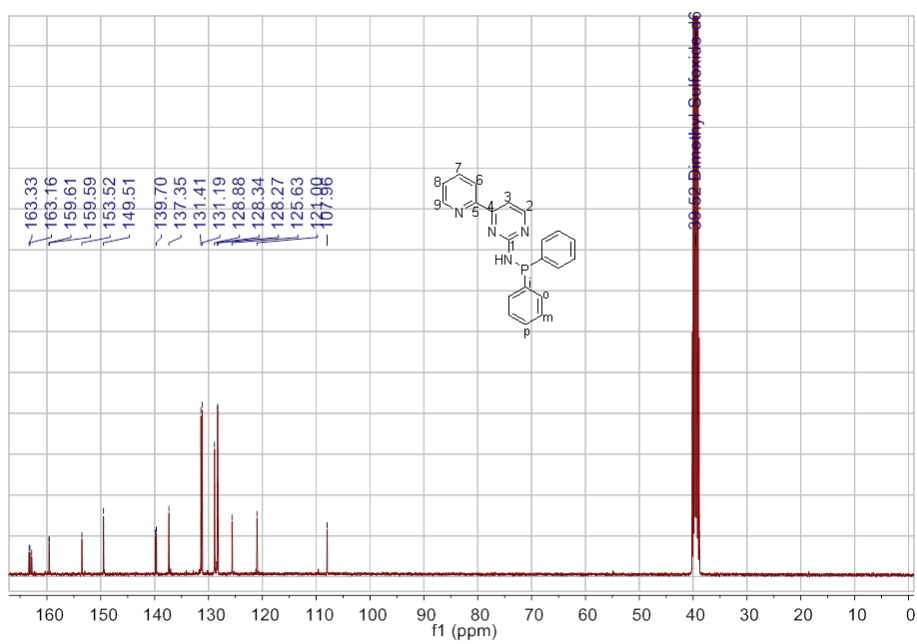

## **NMR Spectra of the Metal Complexes**

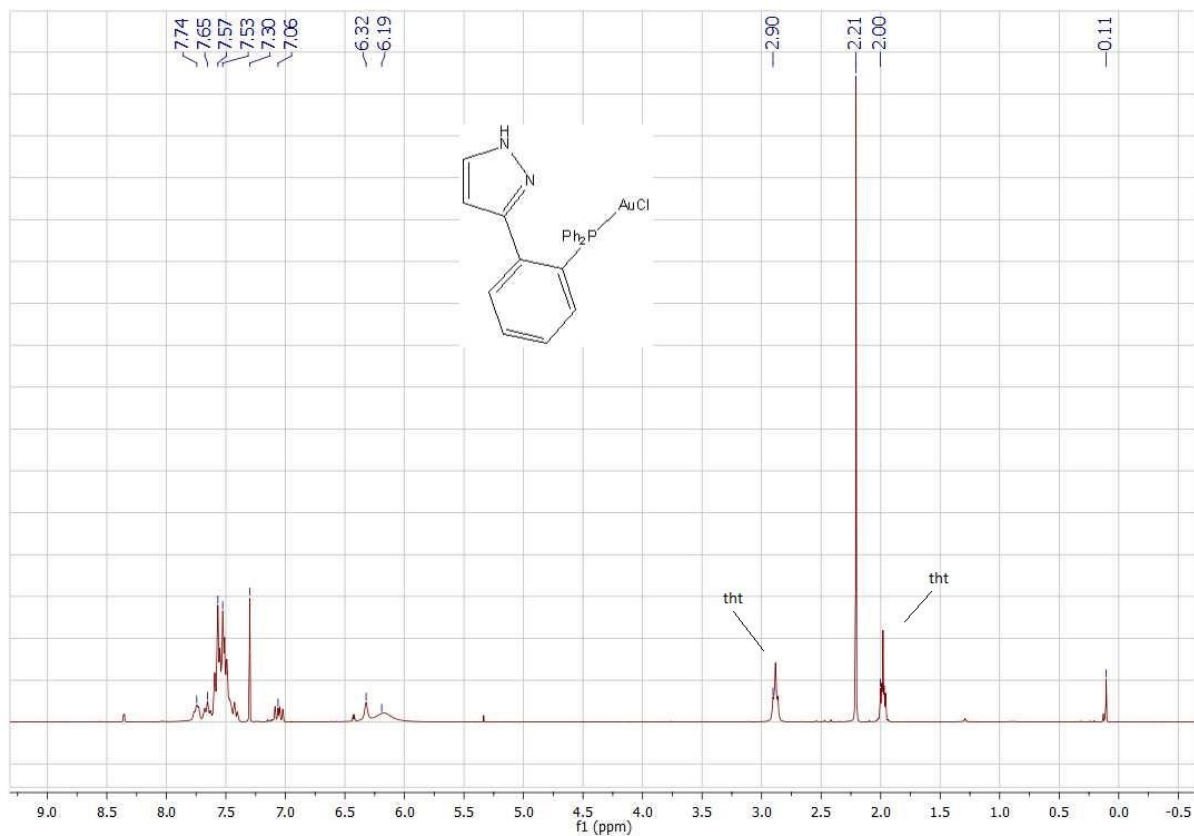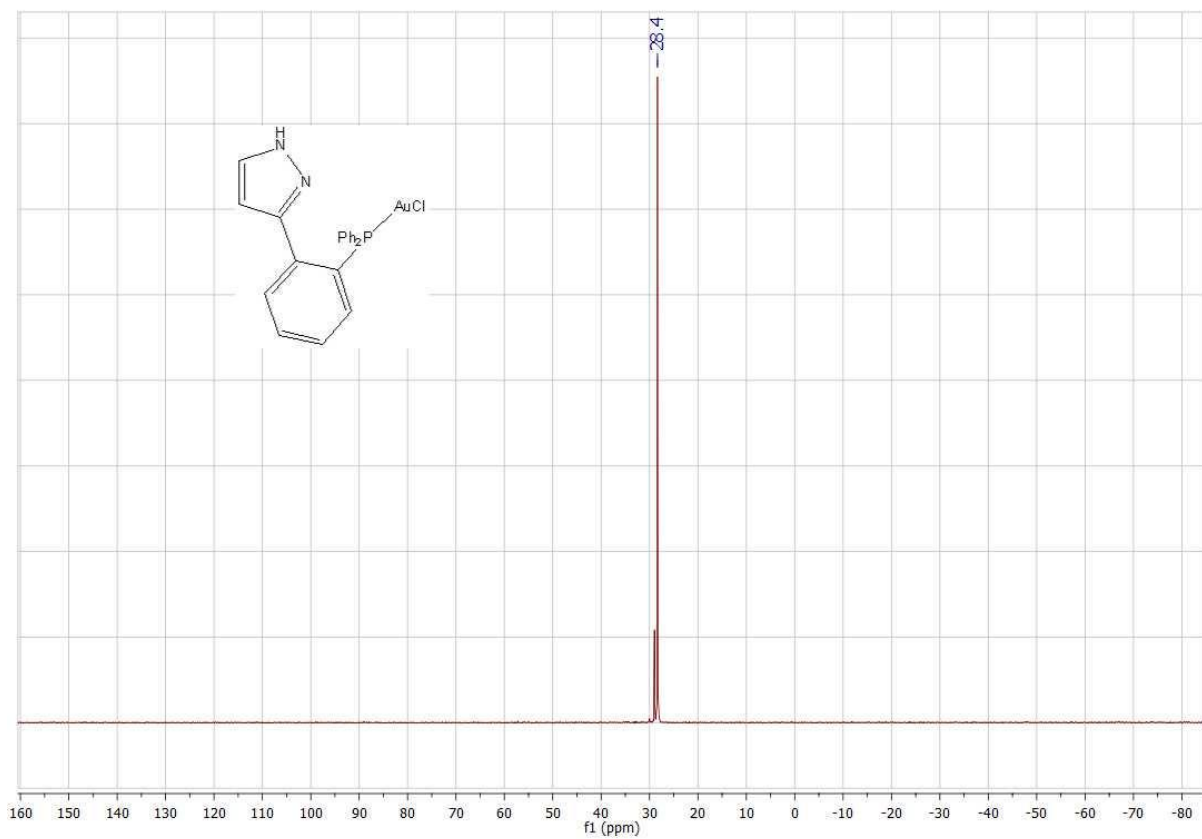



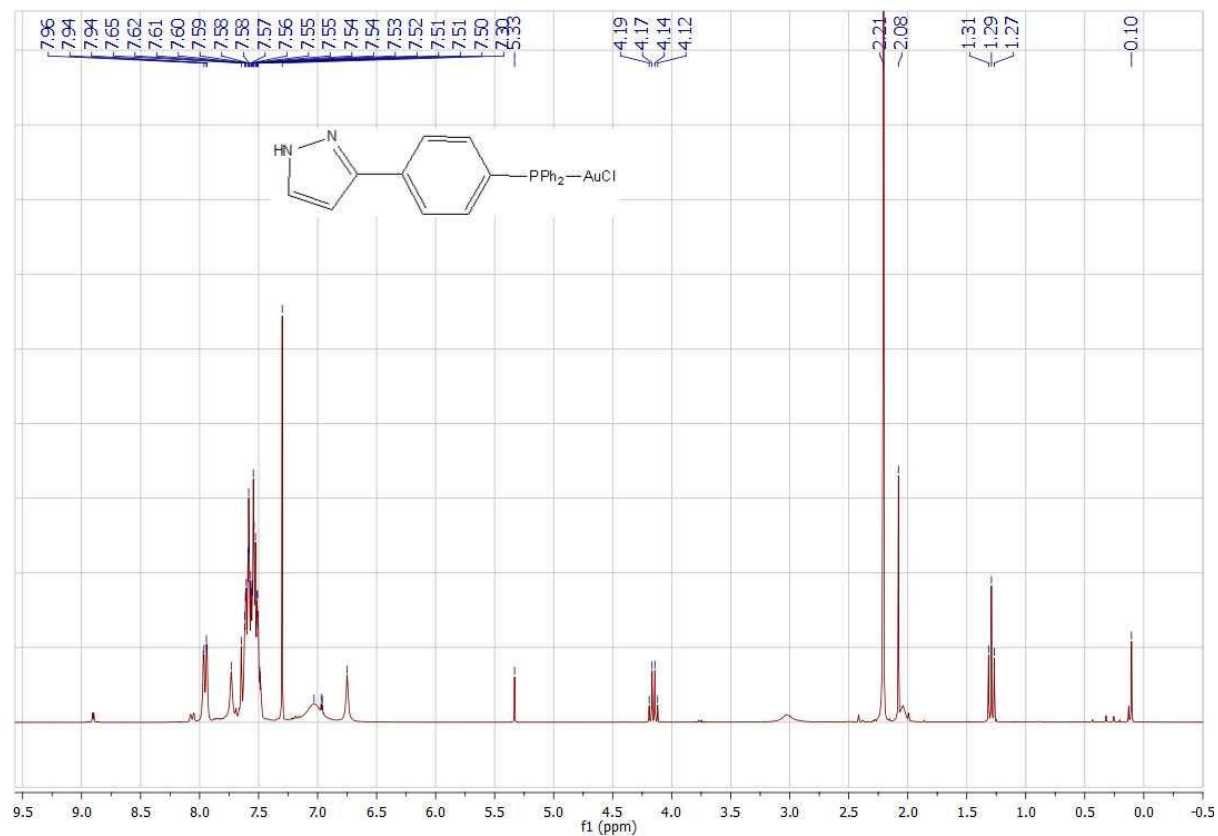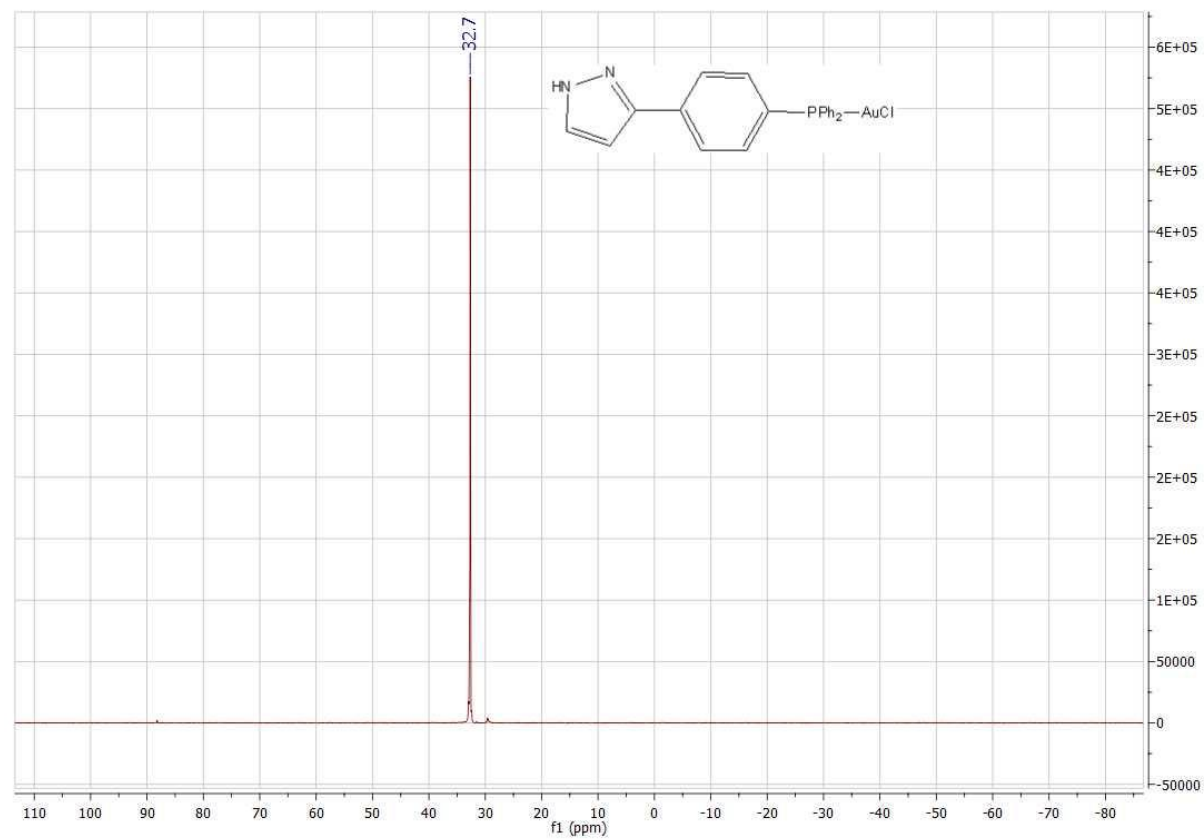

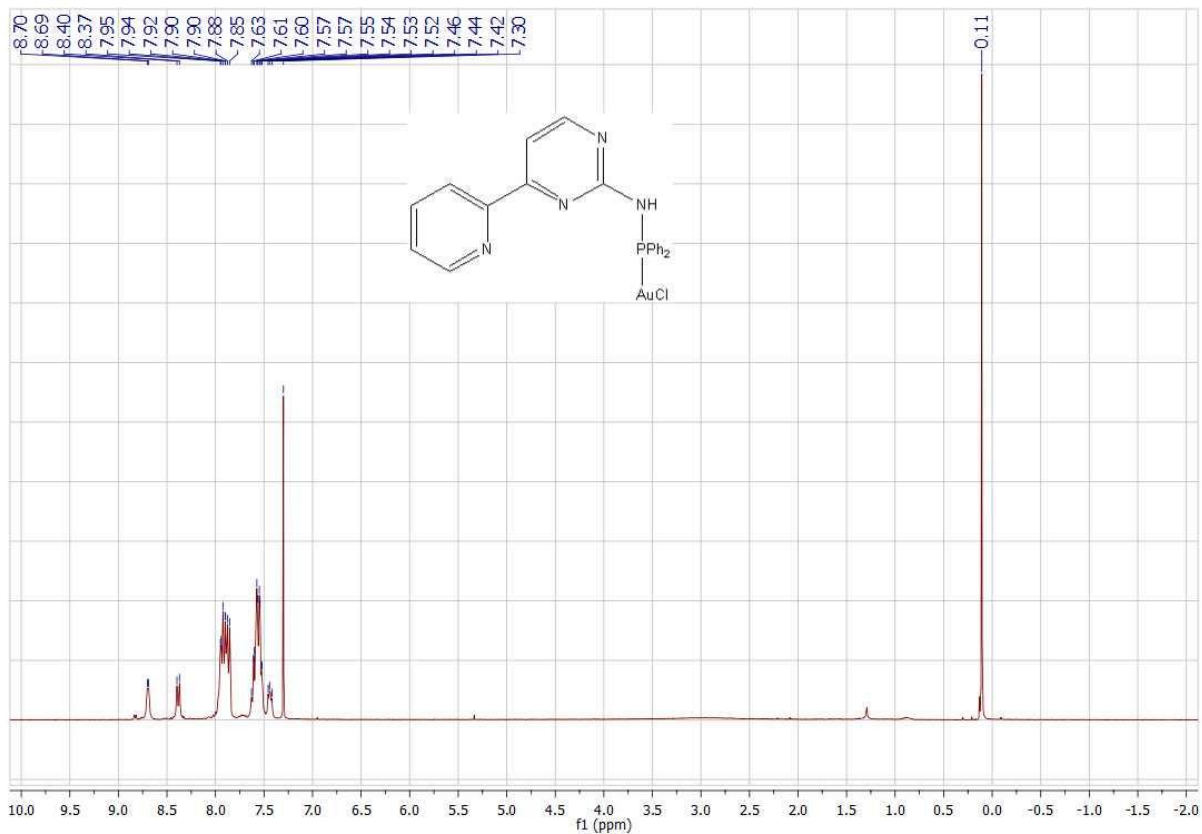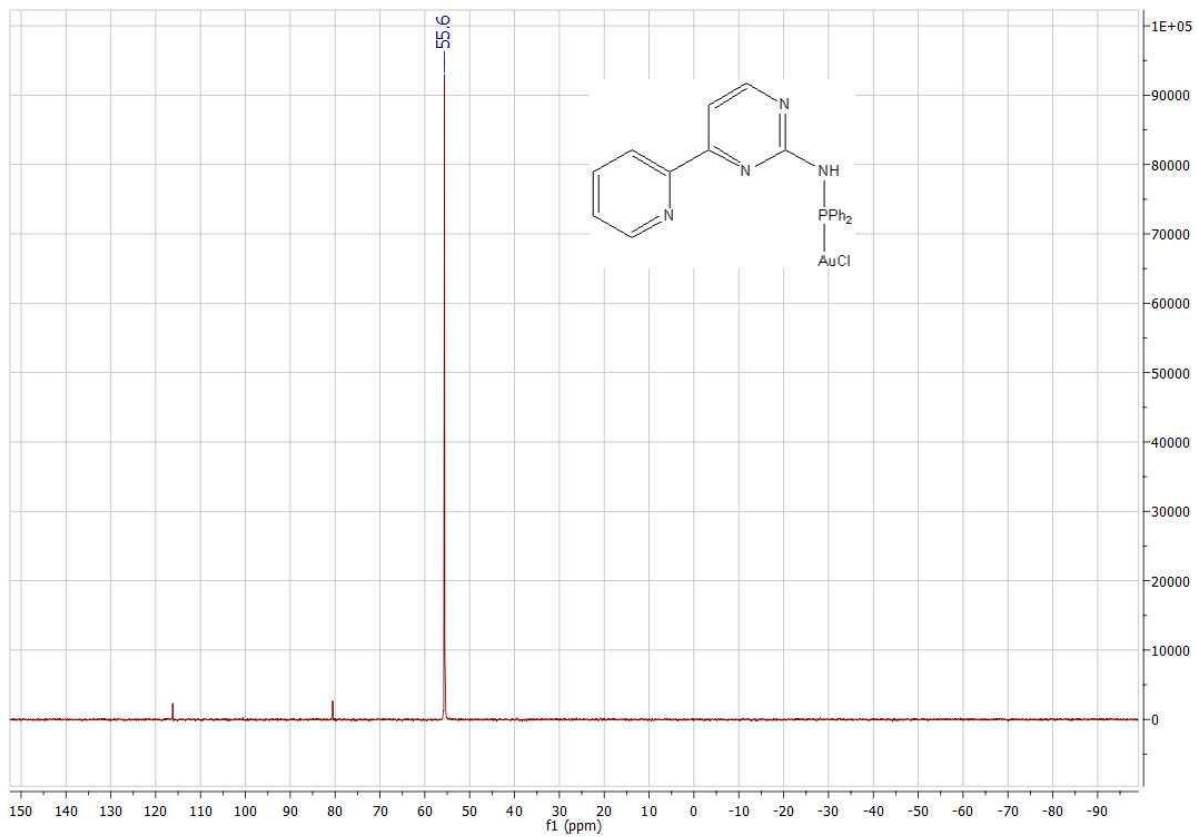

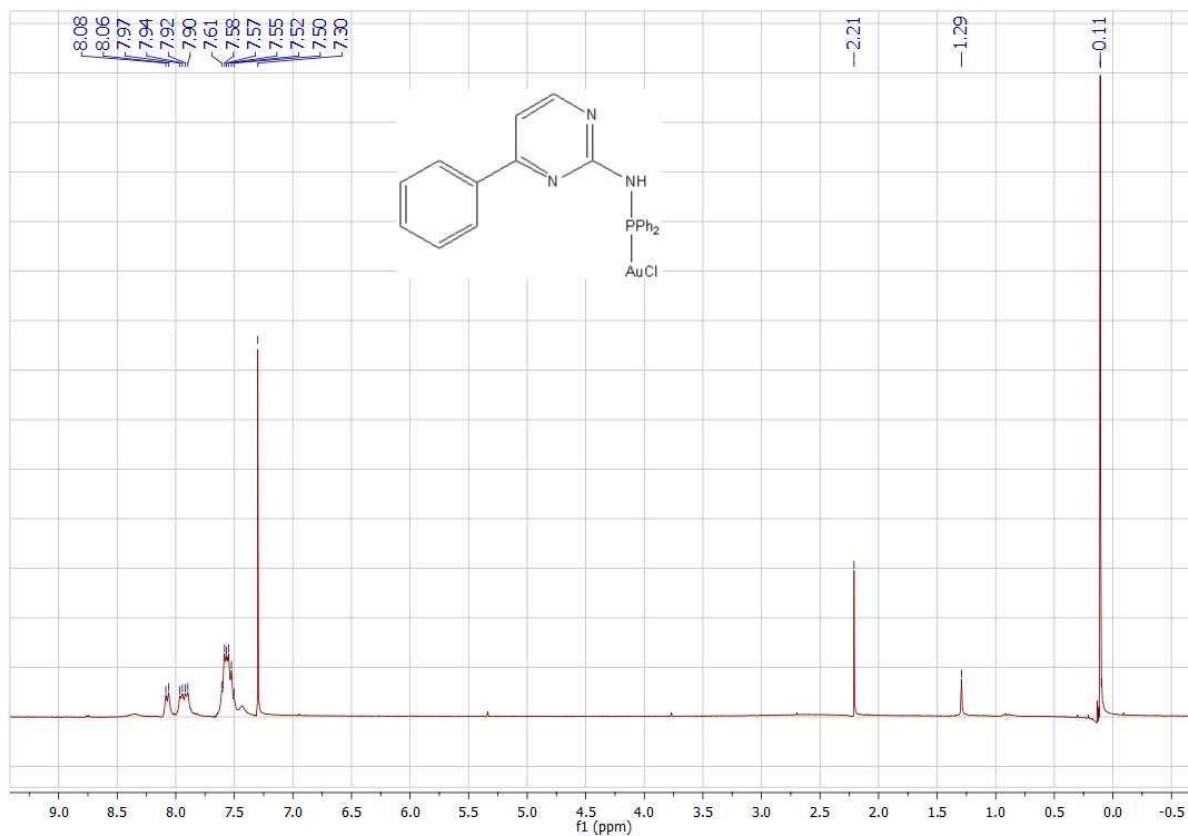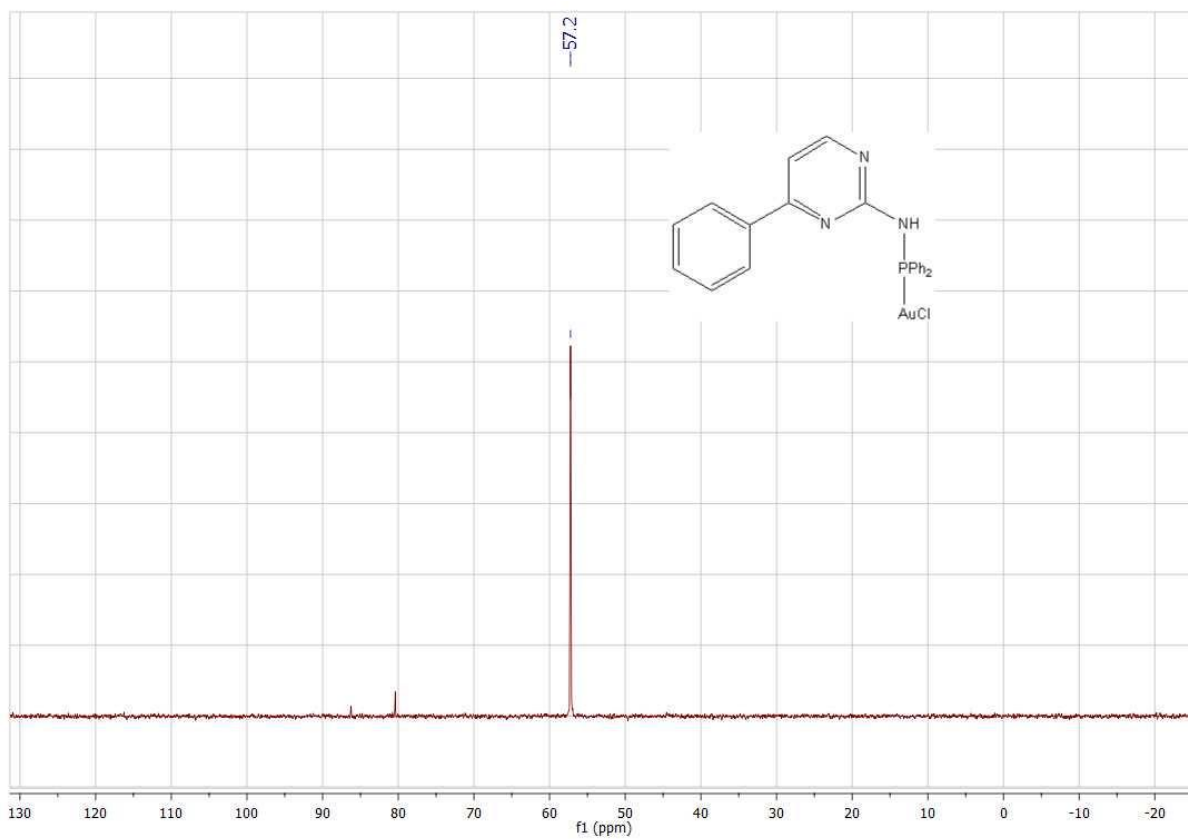

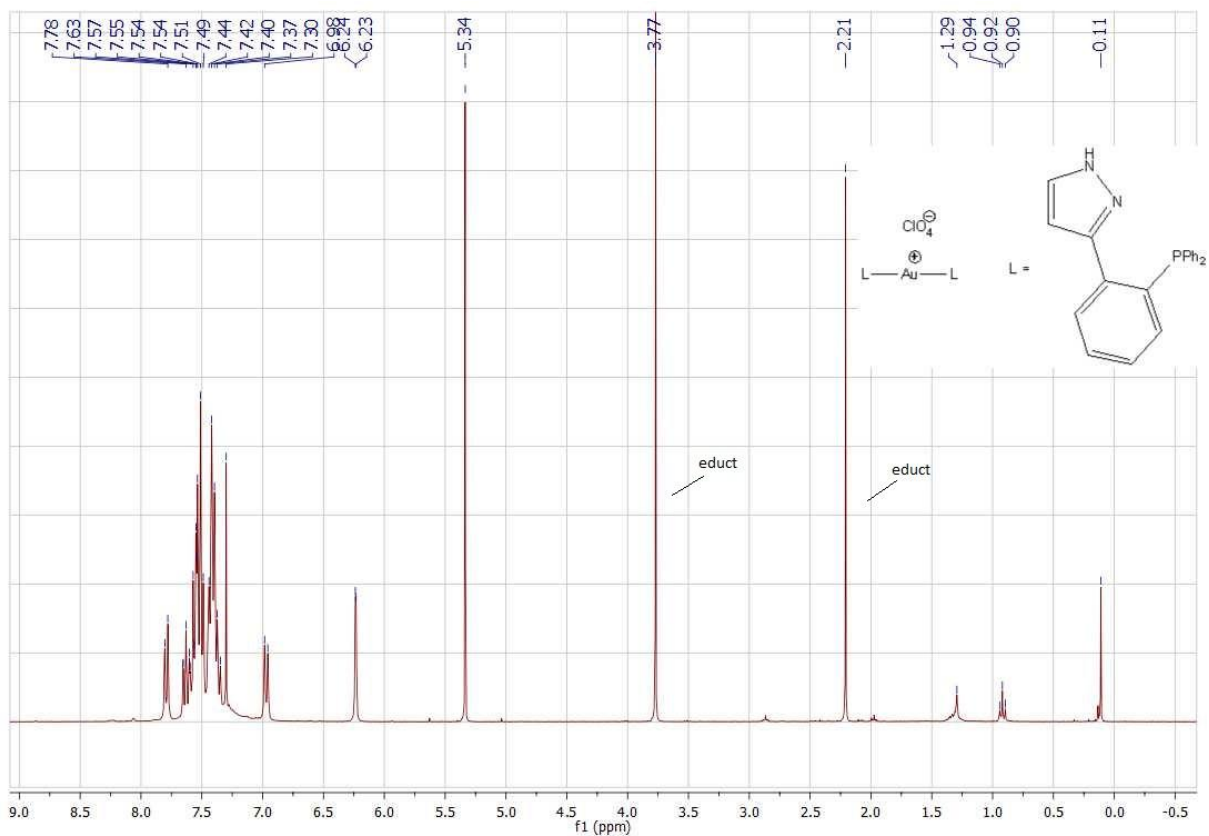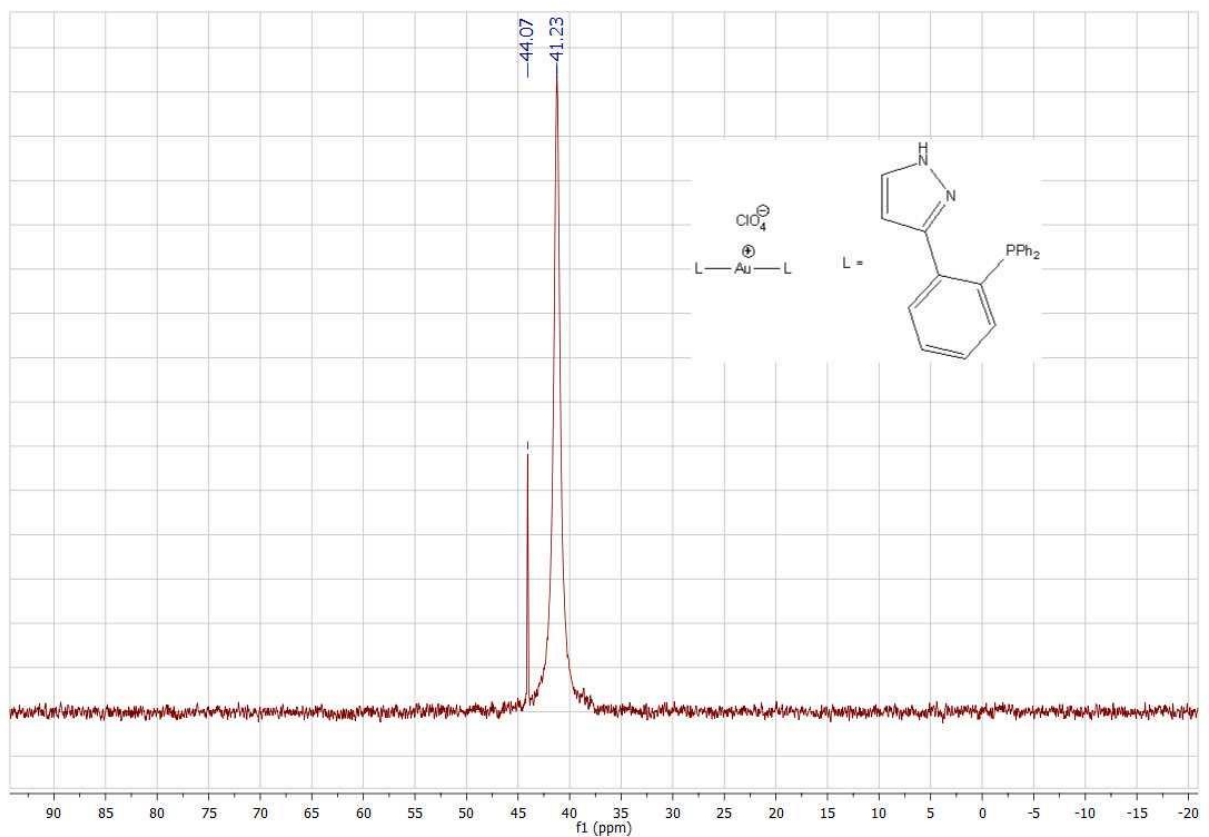

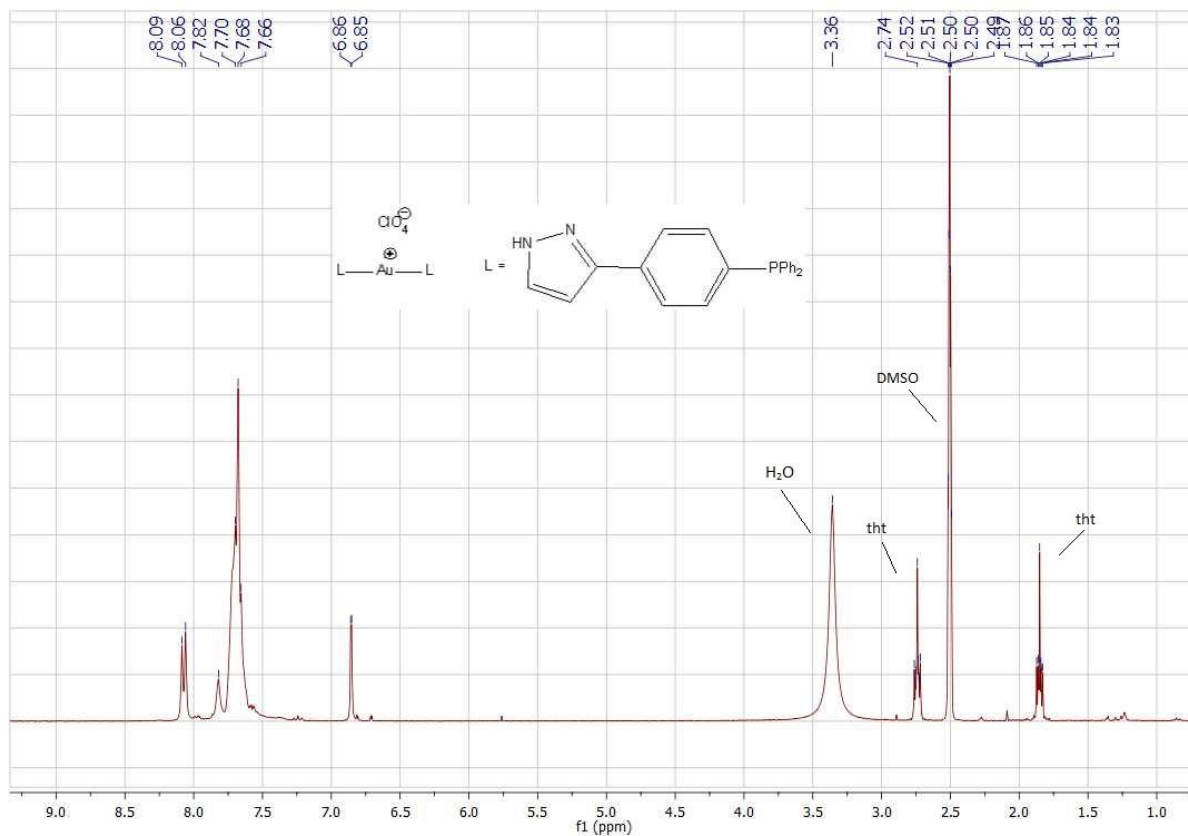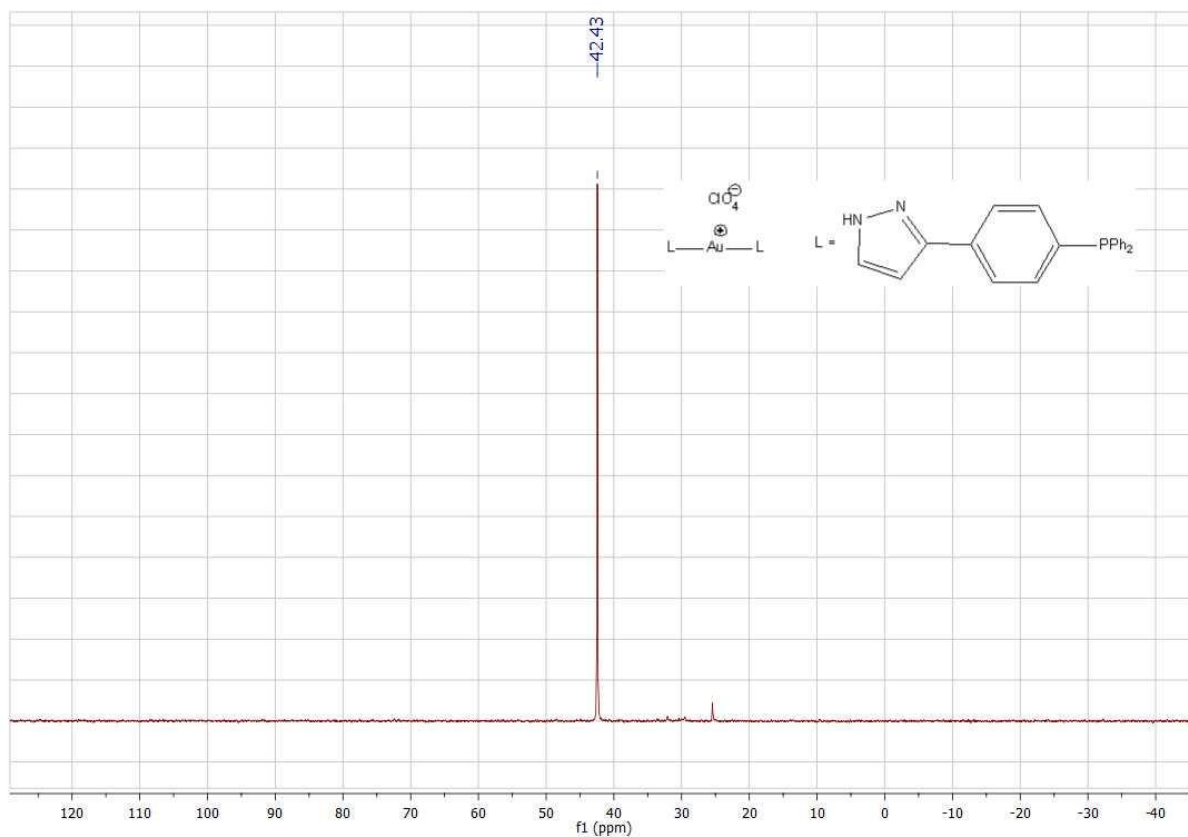

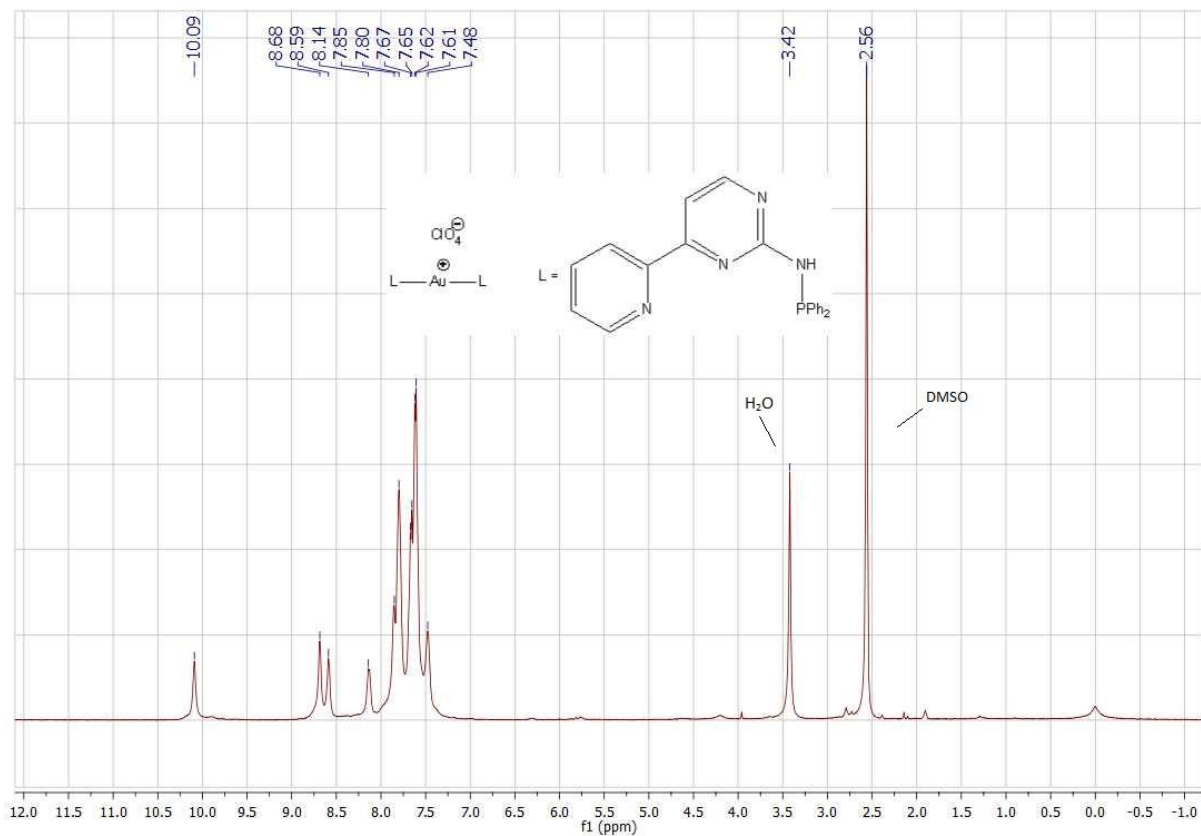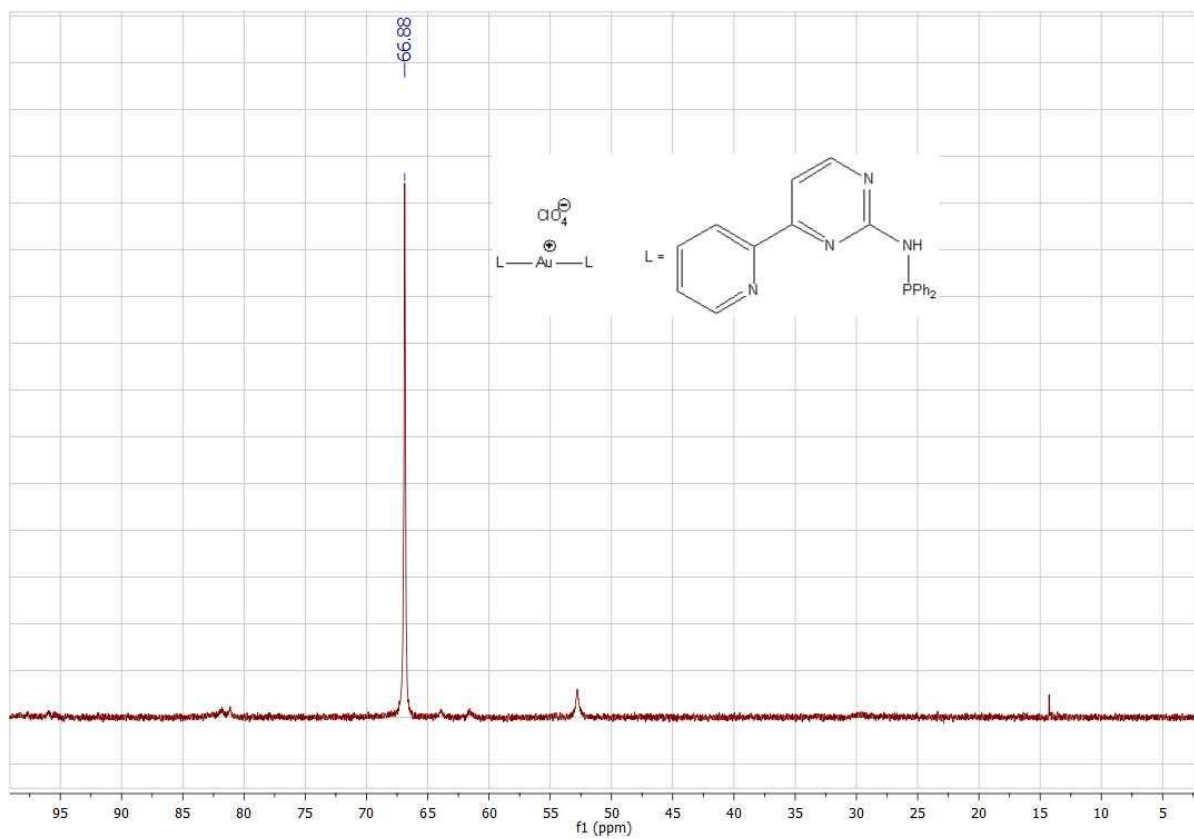

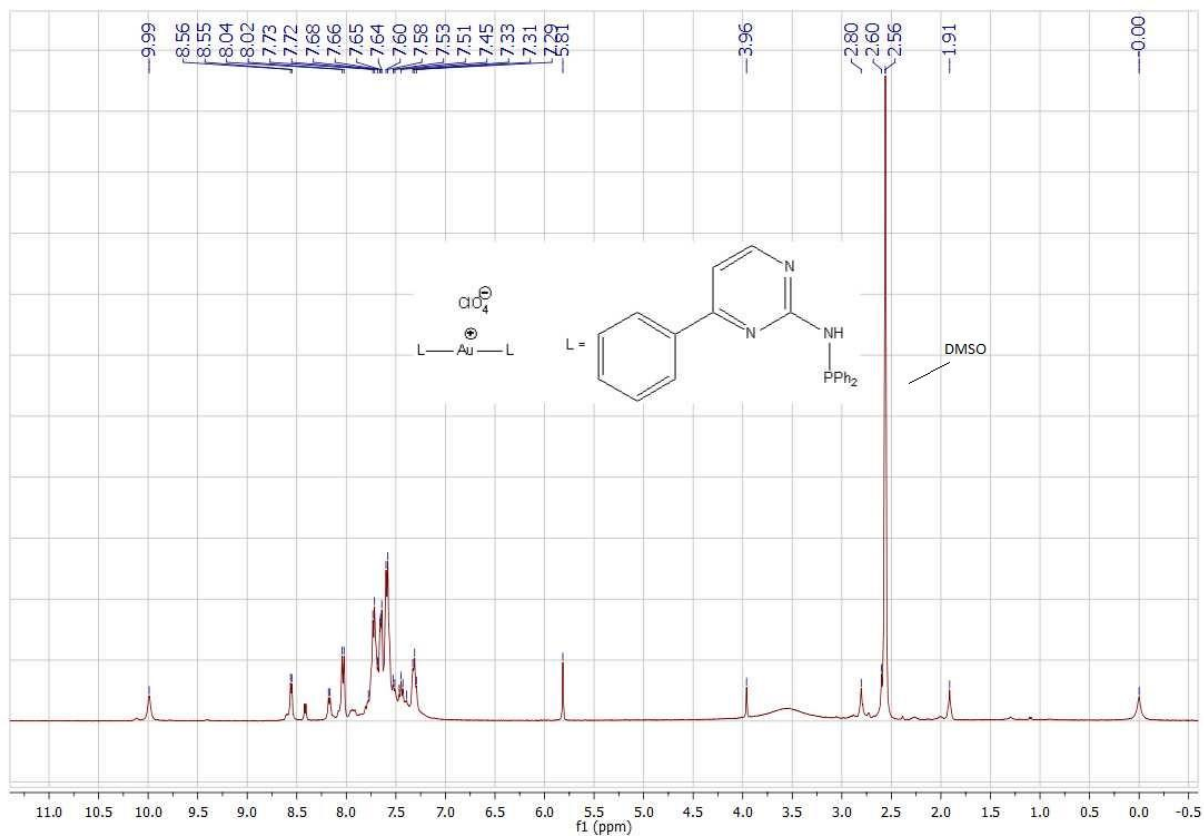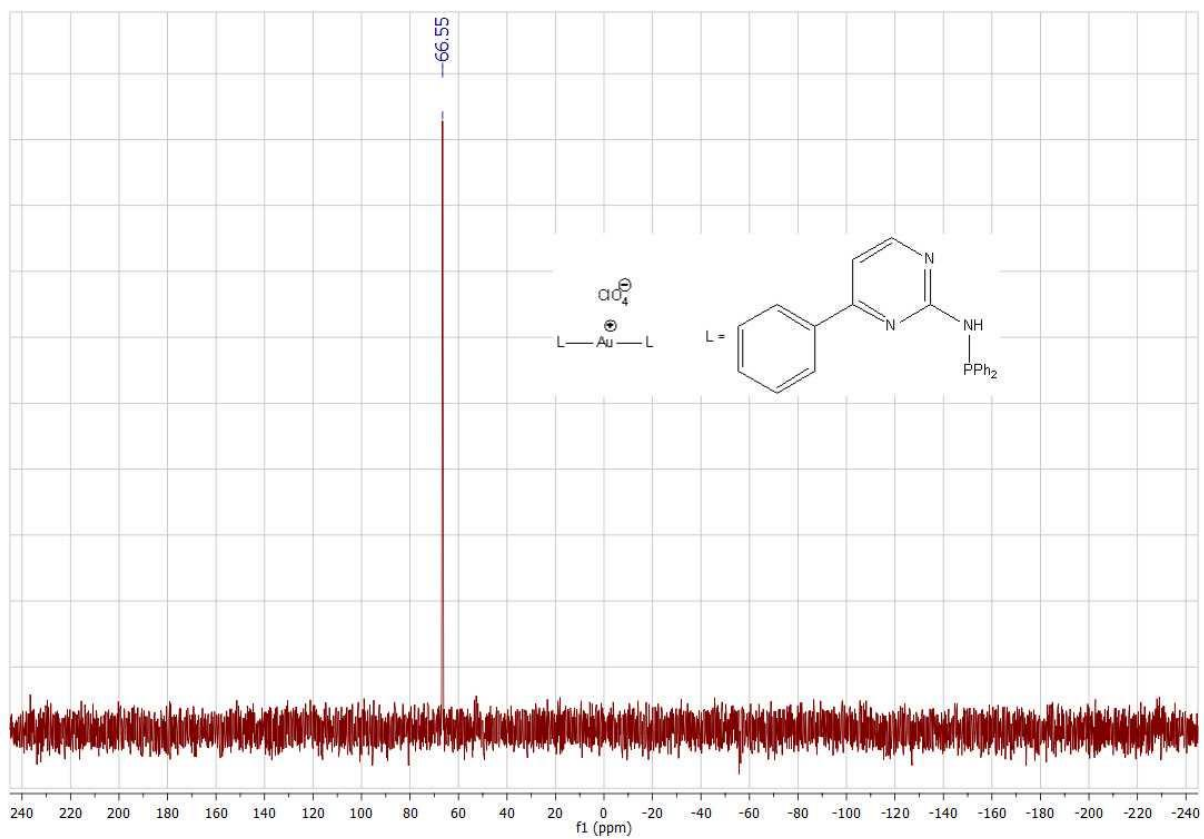

Supplement: c3dt52893f.pdf [file c3dt52893f.pdf]
